# Supplementary material
Source: publisher figshare collection journal article supplement (https://acs.figshare.com/ndownloader/files/21219942)
Supplement: Supplementary file 1 [file 21219942]

# Promoting Crystal Distribution Uniformity Based on the CVD Method with the Aid of Finite Element Methods

*Feng Zhang,<sup>a</sup> Zeping Wang,<sup>a</sup> Kai Zheng,<sup>a</sup> Caining Feng,<sup>b</sup> Ran Yao,<sup>c</sup> Luqi Tao,<sup>c</sup> Jiabing Yu,<sup>a</sup> and  
Xianping Chen<sup>\*,a, c</sup>*

<sup>a</sup> Key Laboratory of Optoelectronic Technology & Systems, Education Ministry of China,  
Chongqing University, Chongqing 400044, China

<sup>b</sup> The Faculty of Mechanical and Electrical Engineering, Guilin University of Electronic  
Technology, Guilin 541004, China

<sup>c</sup> The State Key Laboratory of Power Transmission Equipment and System Security and New  
Technology, Chongqing University, Chongqing 400044, China

**Table S1.** Detailed parameters used in simulation and experiment

| Variable name                             | Value (mm) |
|-------------------------------------------|------------|
| Length of quartz boat                     | 100        |
| outer diameter of quartz boat             | 15         |
| The thickness of quartz boat wall         | 1          |
| Length of silica/silicon substrate        | 20         |
| Width of silica/silicon substrate         | 15         |
| The thickness of silica/silicon substrate | 1          |
| Outer diameter of quartz tube             | 40         |
| The thickness of quartz tube              | 3.5        |

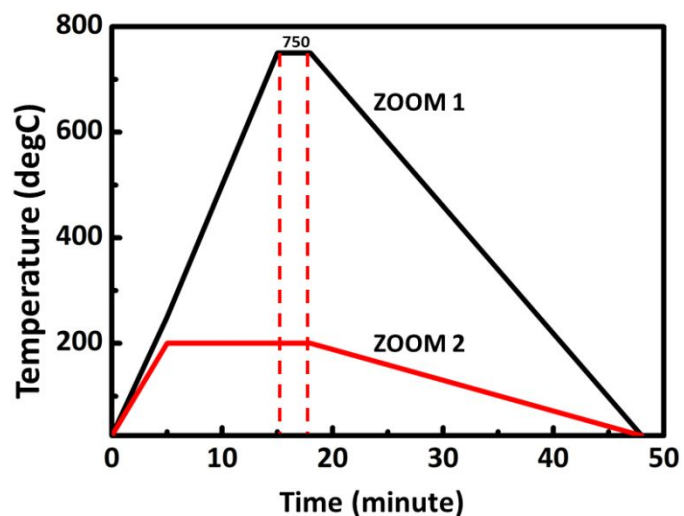

**Figure S1.** The heating process in two heating zoom.

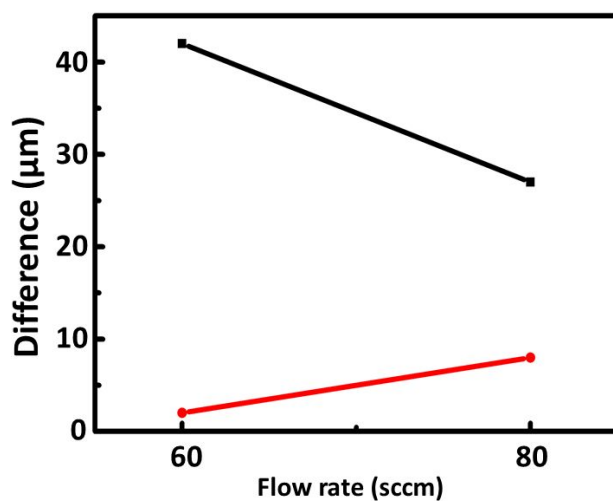

**Figure S2.** The maximum crystal size difference under two methods
